# Supplementary material for: A High Rate of COVID-19 Vaccine Hesitancy Among Arabs: Results of a Large-scale Survey
Source: bioRxiv or medRxiv preprint supplement (doi:10.1101/2021.03.09.21252764), 2021-03-10

**A**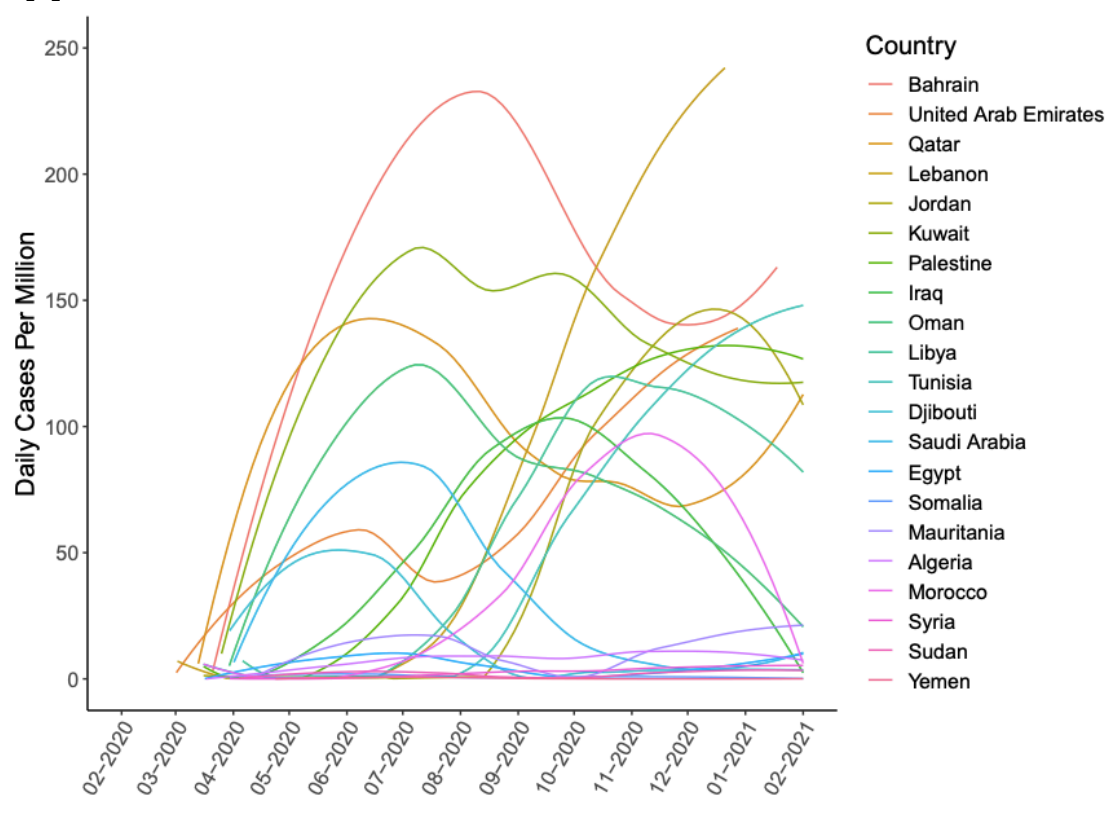**B**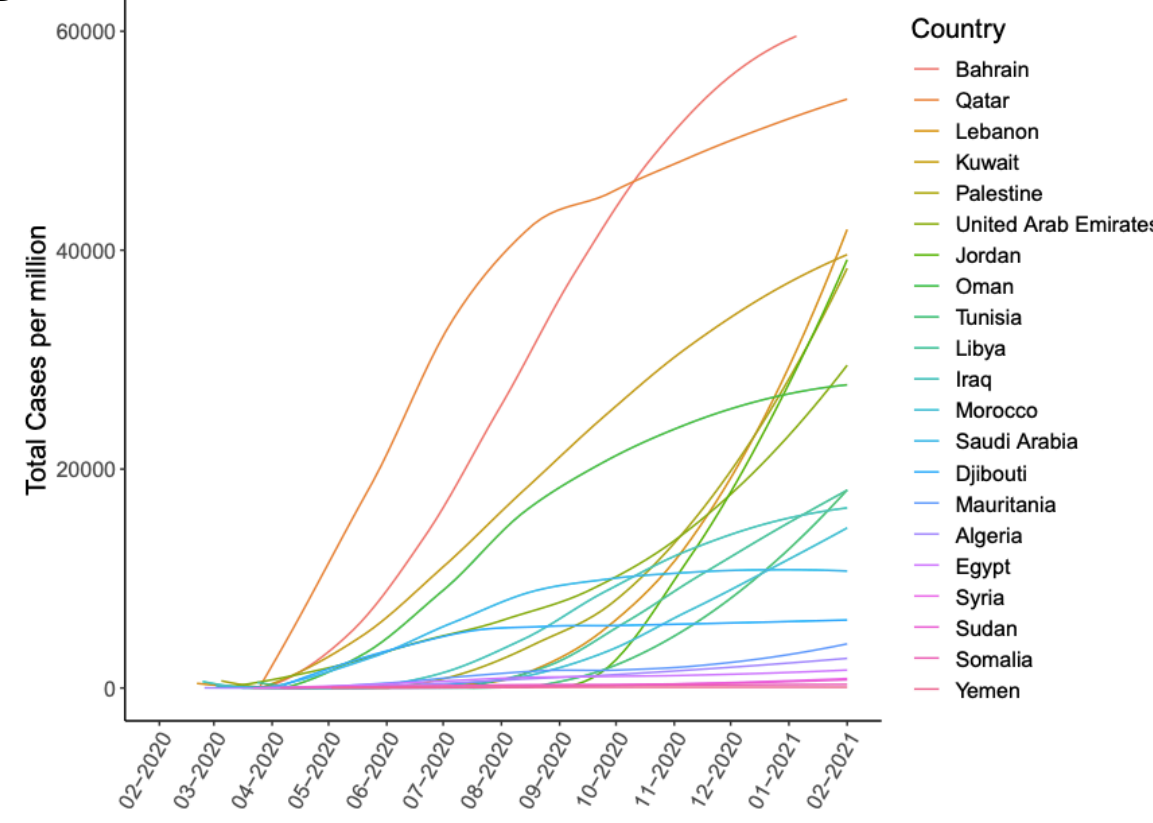**C**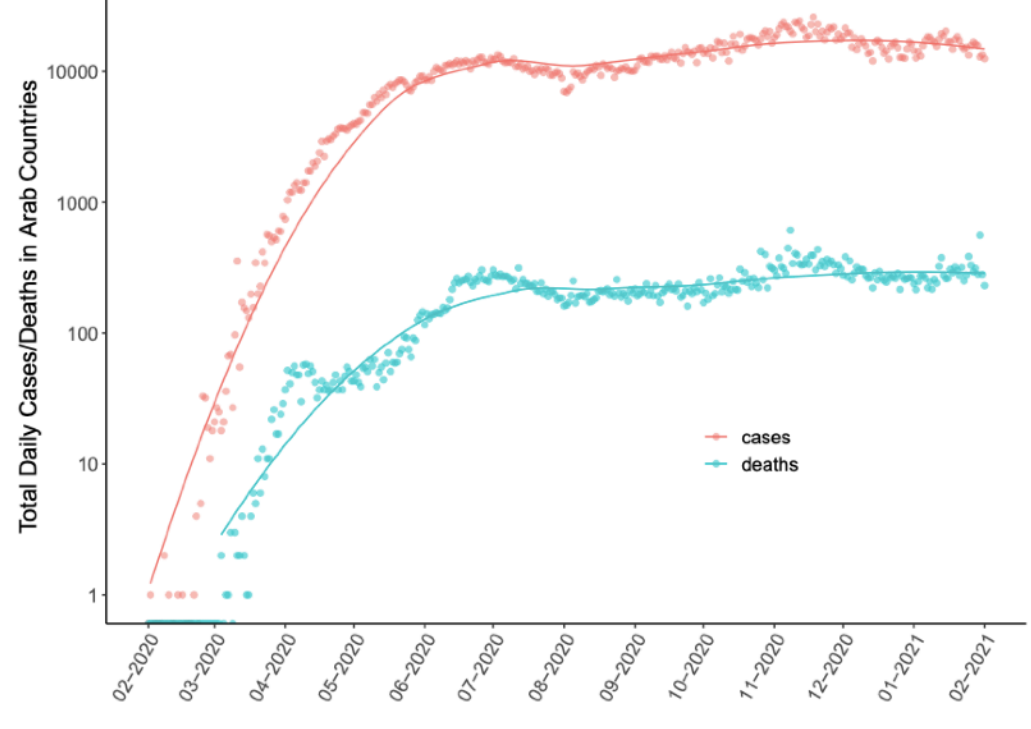**D**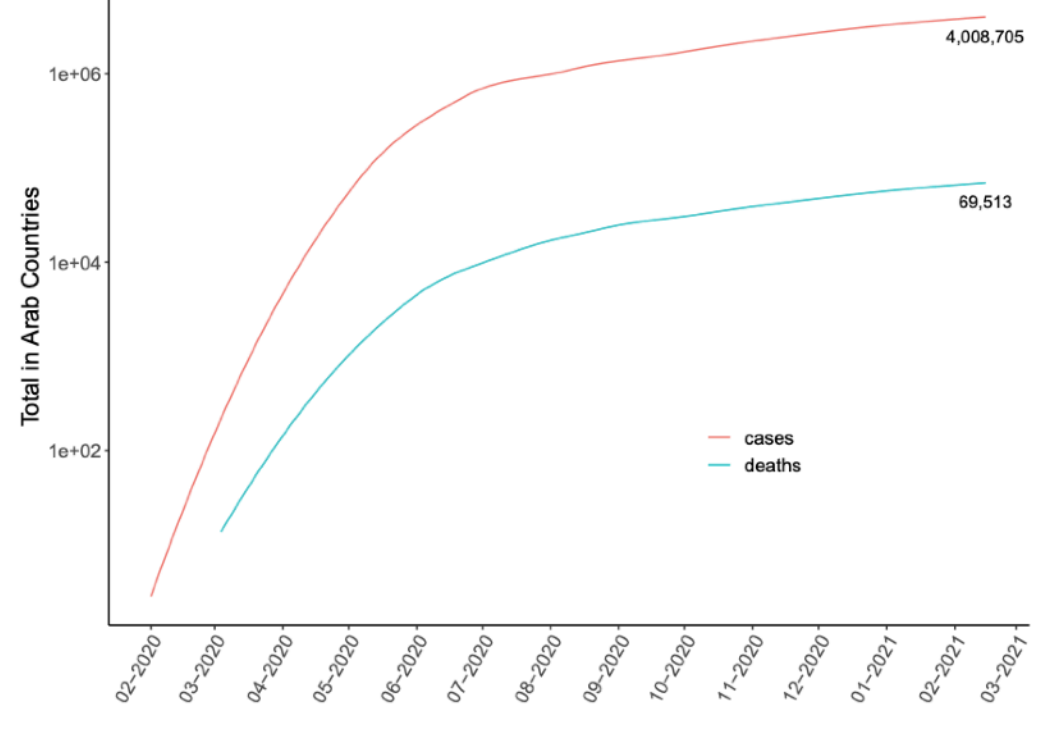**E**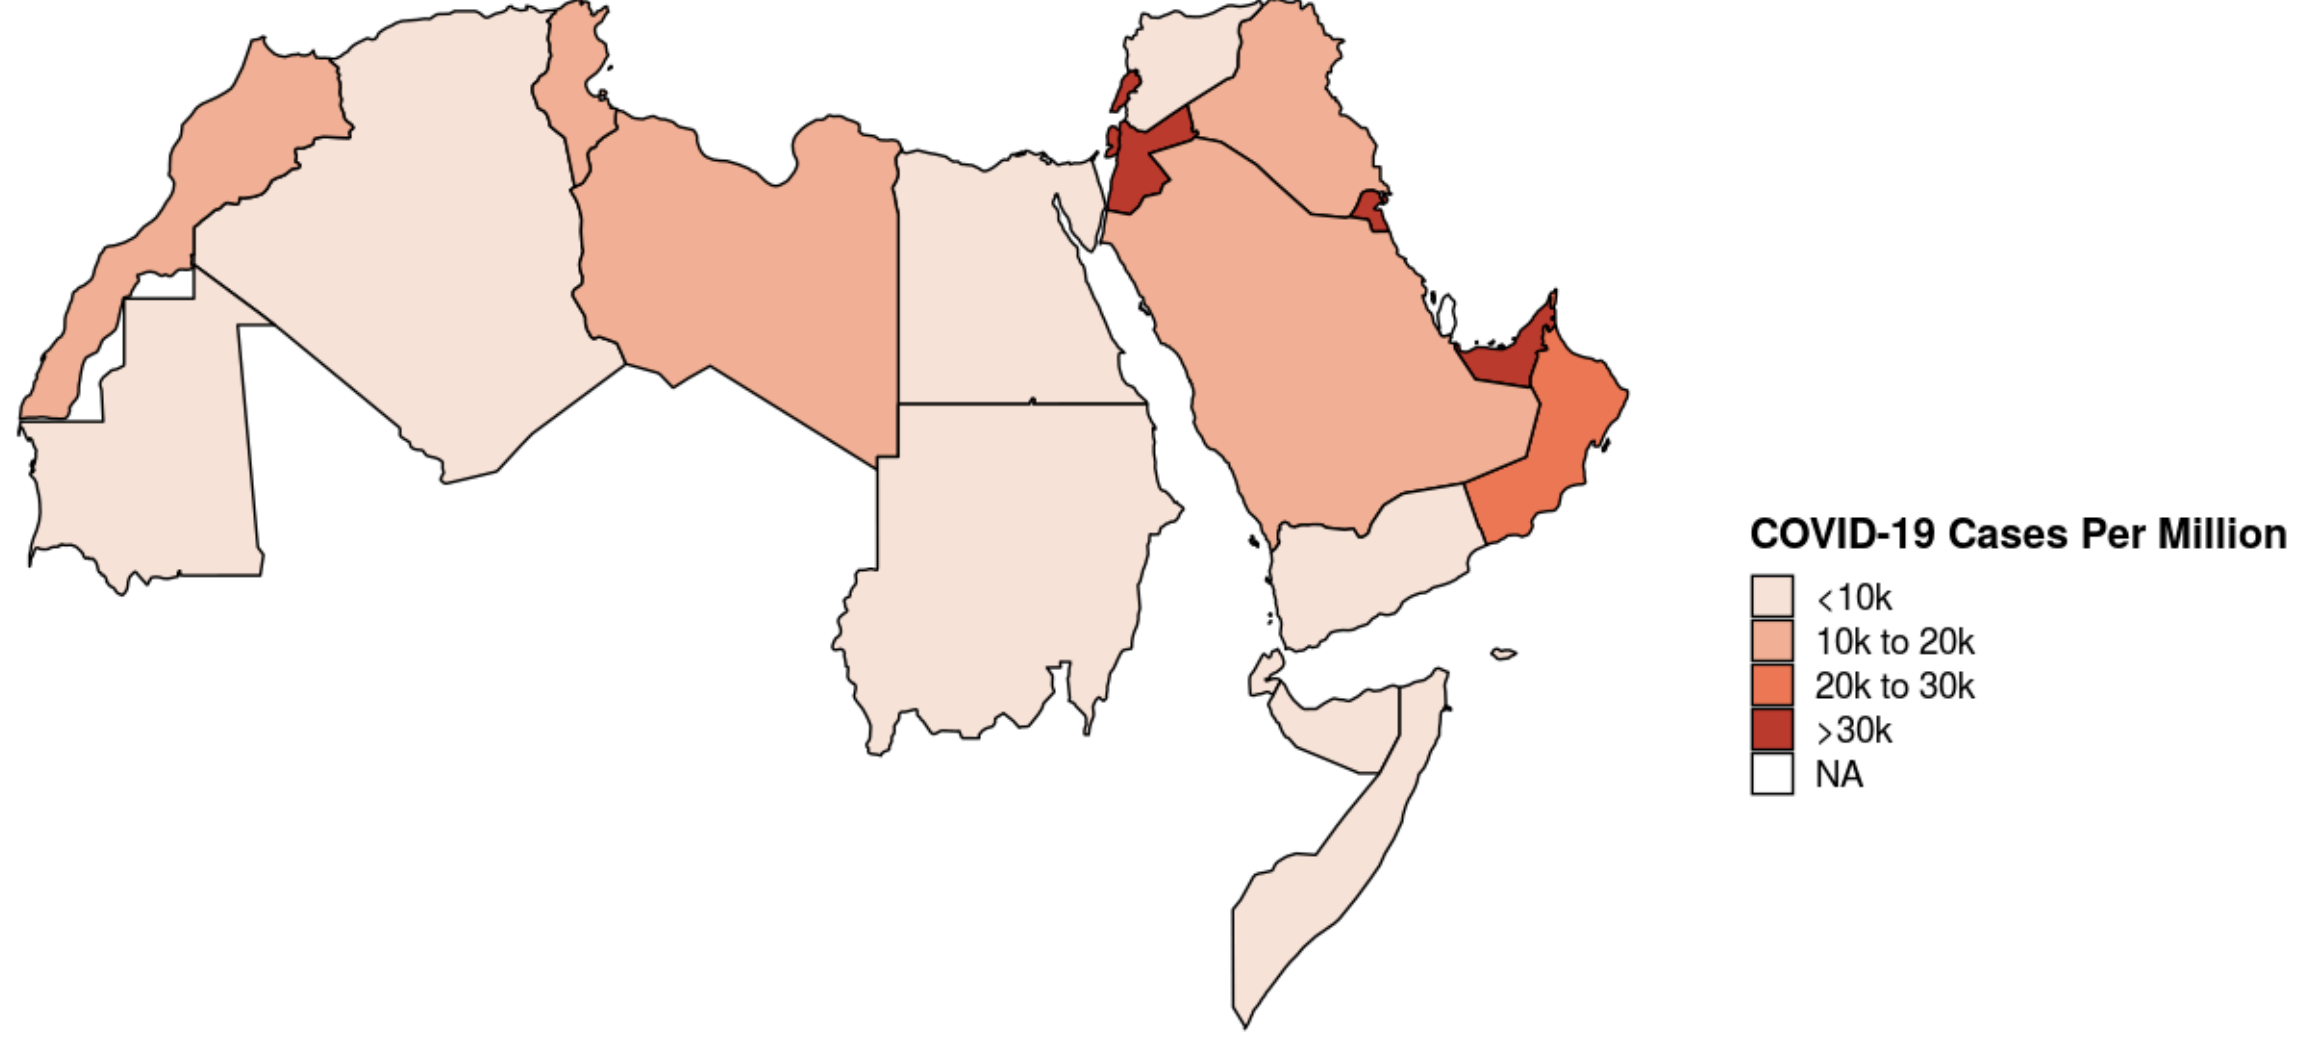

Supplement: Supplementary file [file media-1.pdf]
