# Supplementary material for: A High Rate of COVID-19 Vaccine Hesitancy Among Arabs: Results of a Large-scale Survey
Source: bioRxiv or medRxiv preprint supplement (doi:10.1101/2021.03.09.21252764), 2021-03-10
Supplement: Supplementary file [file media-5.pdf]

**Table 1 supplementary. Differences in Barriers for Acceptance according to Country of Residence, Gender and Academic Achievement, compared using chi-square test.**

| Question                                          | Country         |                 |         | Gender          |                 |         | Academic Education |                 |         |
|---------------------------------------------------|-----------------|-----------------|---------|-----------------|-----------------|---------|--------------------|-----------------|---------|
|                                                   | Arab countries  | Other countries | p       | Female          | Male            | p       | Higher education   | Lower education | p       |
|                                                   | 25884<br>(84.1) | 4895 (15.9)     |         | 12804<br>(41.6) | 17975<br>(58.4) |         | 18942 (61.5)       | 11837 (38.5)    |         |
| <b>I had/have COVID</b>                           | 2820 (86.7)     | 434 (13.3)      | NS      | 1271<br>(39.1)  | 1983<br>(60.9)  | <0.0001 | 2124 (65.3)        | 1130 (34.7)     | <0.001  |
| <b>Afraid of unknown side effects</b>             | 17505<br>(83.7) | 3405 (16.3)     | <0.0001 | 8777<br>(42.0)  | 12133<br>(58.0) | <0.0001 | 13211 (63.2)       | 7699 (36.8)     | <0.0001 |
| <b>I am not eligible (pregnant or &lt;16 old)</b> | 841 (83.9)      | 161 (16.1)      | <0.0001 | 843 (84.1)      | 159 (15.9)      | <0.0001 | 591 (59.0)         | 411 (41.0)      | <0.0001 |
| <b>Infections numbers are decreasing</b>          | 2971 (90.9)     | 299 (9.1)       | <0.001  | 1387<br>(42.4)  | 1883<br>(57.6)  | <0.0001 | 2104 (64.3)        | 1166 (35.7)     | <0.001  |
| <b>Vaccine production was rushed</b>              | 13571<br>(84.6) | 2474 (15.4)     | <0.0001 | 6899<br>(43.0)  | 9146<br>(57.0)  | <0.0001 | 10480 (65.3)       | 5565 (34.7)     | <0.0001 |
| <b>Most people already had COVID</b>              | 1925 (90.0)     | 215 (10.0)      | <0.0001 | 1022<br>(47.8)  | 1118<br>(52.2)  | <0.0001 | 1301 (60.8)        | 839 (39.2)      | NS      |
| <b>Most infected individuals recover</b>          | 6395 (83.7)     | 1242 (16.3)     | NS      | 2995<br>(39.2)  | 4642<br>(60.8)  | <0.0001 | 4746 (62.1)        | 2891 (37.9)     | <0.0001 |
| <b>Do not believe I will get COVID19</b>          | 587 (86.3)      | 93 (13.7)       | <0.0001 | 204 (30.0)      | 476 (70.0)      | <0.0001 | 309 (45.4)         | 371 (54.6)      | <0.0001 |
| <b>Vaccines contain Aluminum</b>                  | 2579 (83.8)     | 497 (16.2)      | <0.0001 | 1583<br>(51.5)  | 1493<br>(48.5)  | NS      | 1944 (63.2)        | 1132 (36.8)     | <0.0001 |
| <b>Do not believe in vaccines in general</b>      | 3681 (83.0)     | 756 (17.0)      | <0.0001 | 2031<br>(45.8)  | 2406<br>(54.2)  | <0.05   | 2603 (58.7)        | 1834 (41.3)     | <0.0001 |
| <b>Coronavirus/vaccine are conspiracy</b>         | 5463 (84.6)     | 996 (15.4)      | <0.0001 | 2977<br>(46.1)  | 3482<br>(53.9)  | <0.05   | 3851 (59.6)        | 2608 (40.4)     | <0.0001 |
| <b>No published studies done for vaccine</b>      | 5991 (89.5)     | 702 (10.5)      | <0.0001 | 3156<br>(47.2)  | 3537<br>(52.8)  | NS      | 4305 (64.3)        | 2388 (35.7)     | <0.05   |
| <b>Inufficient numbers on studies</b>             | 8083 (86.0)     | 1312 (14.0)     | <0.0001 | 4488<br>(47.8)  | 4907<br>(52.2)  | <0.05   | 6072 (64.6)        | 3323 (35.4)     | <0.001  |
| <b>Do not trust pharmaceutical/studies</b>        | 9974 (86.0)     | 1617 (14.0)     | <0.0001 | 5060<br>(43.7)  | 6531<br>(56.3)  | <0.0001 | 7306 (63.0)        | 4285 (37.0)     | <0.05   |

|                                           |              |             |         |             |              |         |              |             |         |
|-------------------------------------------|--------------|-------------|---------|-------------|--------------|---------|--------------|-------------|---------|
| <b>Panedemic is exaggerated by pharma</b> | 7185 (83.5)  | 1420 (16.5) | <0.001  | 3566 (41.4) | 5039 (58.6)  | <0.0001 | 5614 (65.2)  | 2991 (34.8) | <0.0001 |
| <b>No value for new strains</b>           | 6231 (84.1)  | 1176 (15.9) | <0.0001 | 3660 (49.4) | 3747 (50.6)  | <0.0001 | 4759 (64.3)  | 2648 (35.7) | NS      |
| <b>may get COVID19 after Vaccine</b>      | 1240 (79.6)  | 318 (20.4)  | <0.0001 | 697 (44.7)  | 861 (55.3)   | NS      | 985 (63.2)   | 573 (36.8)  | <0.05   |
| <b>Vaccine immunity is short</b>          | 3507 (83.4)  | 700 (16.6)  | <0.0001 | 1827 (43.4) | 2380 (56.6)  | <0.0001 | 2895 (68.8)  | 1312 (31.2) | <0.0001 |
| <b>Vaccine may cause death</b>            | 3929 (84.4)  | 725 (15.6)  | <0.0001 | 2220 (47.7) | 2434 (52.3)  | <0.0001 | 2825 (60.7)  | 1829 (39.3) | <0.001  |
| <b>I have allergies to food/drugs</b>     | 658 (84.5)   | 121 (15.5)  | <0.0001 | 435 (55.8)  | 344 (44.2)   | <0.05   | 502 (64.4)   | 277 (35.6)  | <0.0001 |
| <b>Most vaccinated people had SE</b>      | 2415 (85.9)  | 396 (14.1)  | <0.0001 | 1390 (49.4) | 1421 (50.6)  | <0.05   | 1679 (59.7)  | 1132 (40.3) | NS      |
| <b>Afraid of SE mentioned in studies</b>  | 5276 (85.6)  | 887 (14.4)  | <0.0001 | 2965 (48.1) | 3198 (51.9)  | <0.0001 | 3582 (58.1)  | 2581 (41.9) | <0.0001 |
| <b>Vaccines irreversibly alter DNA</b>    | 6388 (84.1)  | 1209 (15.9) | <0.0001 | 3464 (45.6) | 4133 (54.4)  | <0.05   | 4726 (62.2)  | 2871 (37.8) | <0.0001 |
| <b>I have a chronic disease</b>           | 1111 (84.4)  | 206 (15.6)  | <0.0001 | 653 (49.6)  | 664 (50.4)   | <0.05   | 833 (63.2)   | 484 (36.8)  | <0.0001 |
| <b>Vaccine can cause COVID19</b>          | 5463 (85.5)  | 926 (14.5)  | <0.0001 | 3058 (47.9) | 3331 (52.1)  | <0.0001 | 3703 (58.0)  | 2686 (42.0) | <0.05   |
| <b>Afraid of needles</b>                  | 1517 (86.4)  | 238 (13.6)  | <0.0001 | 965 (55.0)  | 790 (45.0)   | <0.05   | 910 (51.9)   | 845 (48.1)  | <0.0001 |
| <b>Vaccines were not tested in Arabs</b>  | 2255 (87.5)  | 323 (12.5)  | <0.0001 | 1264 (49.0) | 1314 (51.0)  | <0.001  | 1578 (61.2)  | 1000 (38.8) | <0.05   |
| <b>Not enough time to test vaccine</b>    | 15887 (83.7) | 3102 (16.3) | <0.0001 | 8564 (45.1) | 10425 (54.9) | <0.05   | 12292 (64.7) | 6697 (35.3) | <0.0001 |
| <b>Do not trust health authorities</b>    | 12373 (92.8) | 959 (7.2)   | <0.0001 | 5512 (41.3) | 7820 (58.7)  | <0.0001 | 8380 (62.9)  | 4952 (37.1) | <0.0001 |
